# Supplementary material
Source: publisher site journal article supplement (https://www.dovepress.com/article/361881)
Supplement: Supplementary file 1 [file get_supplementary_file.php]

## Supplementary material

**Table S1: Questionnaire items**

| Code                                    | Questionnaire items                                                                |
|-----------------------------------------|------------------------------------------------------------------------------------|
| <b>Teachers' mental health</b>          |                                                                                    |
| MH1                                     | My good physical condition makes me excited to work during the COVID-19 pandemic.  |
| MH2                                     | I am calm in managing problems at work.                                            |
| MH3                                     | I can think rationally about the problems I face at work.                          |
| MH4                                     | I don't feel anxious easily at work.                                               |
| MH5                                     | I can use my working time efficiently.                                             |
| MH6                                     | I am able to use my time for various activities during the COVID-19 pandemic.      |
| <b>Happiness at work</b>                |                                                                                    |
| HW1                                     | I am enthusiastic toward remote teaching during the COVID-19 pandemic.             |
| HW2                                     | I am still enthusiastic when carrying out tasks other than teaching assignments.   |
| HW3                                     | I start my work on time.                                                           |
| HW4                                     | I can comfortably convey ideas to coworkers.                                       |
| HW5                                     | I am able to achieve the targets of the job assigned to me.                        |
| HW6                                     | I actively participate in school activities.                                       |
| <b>Perceived organizational support</b> |                                                                                    |
| POS1                                    | My school really cares about my wellbeing during the COVID-19 pandemic.            |
| POS2                                    | My school cares about my complaints during the COVID-19 pandemic.                  |
| POS3                                    | My school contributes to helping sick teachers during the COVID-19 pandemic.       |
| POS4                                    | I get a fair work assessment even during the COVID-19 pandemic.                    |
| POS5                                    | My school appreciates my extra contribution during the COVID-19 pandemic.          |
| POS6                                    | My boss appreciates the best work I have done for the school during the pandemic.  |
| POS7                                    | My school provides adequate work facilities to work from home during the pandemic. |
| <b>Job satisfaction</b>                 |                                                                                    |
| JS1                                     | I am happy with the allowances given by the school during the COVID-19 pandemic.   |
| JS2                                     | The promotion process continues to run well during the COVID-19 pandemic.          |

|     |                                                                                      |
|-----|--------------------------------------------------------------------------------------|
| JS3 | I am happy with the way the leaders at my school provide feedback on my performance. |
| JS4 | Coworkers are willing to help when I have difficulties during the COVID-19 pandemic. |
| JS5 | I am happy to carry out my work during the COVID-19 pandemic.                        |
